# Supplementary material for: Ticagrelor, but not clopidogrel, reduces arterial thrombosis via endothelial tissue factor suppression
Source: Oxford University Press journal article supplement (doi:10.1093/cvr/cvw233), 2016-11-10
Supplement: cvw233_Supp.pdf [file cvw233_Supp.pdf]

## Supplementary files

### Supplementary figure 1

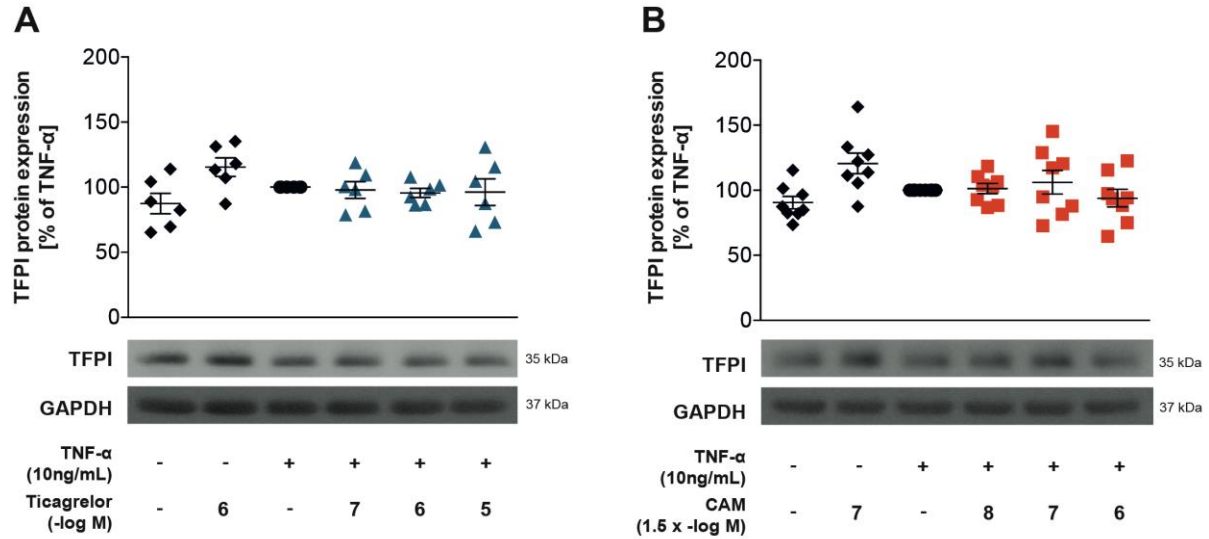

**Supplementary figure 1. Effects of ticagrelor and CAM on TFPI expression in HAECs.** TFPI expression in TNF- $\alpha$ -stimulated HAECs treated with ticagrelor (n=8) (A) or CAM (n=8) (B). CAM = clopidogrel active metabolite; GAPDH = glyceraldehyde 3-phosphate dehydrogenase; HAECs = human aortic endothelial cells; TFPI = tissue factor pathway inhibitor; TNF- $\alpha$  = tumor necrosis factor-alpha.
